# Supplementary material
Source: publisher figshare collection journal article supplement (https://acs.figshare.com/ndownloader/files/4481266)
Supplement: Supplementary file 1 [file 4481266]

 
data_09378 
  
_audit_creation_method            SHELXL-97 
_chemical_name_systematic 
; 
 ? 
; 
_chemical_name_common             ? 
_chemical_melting_point           ? 
_chemical_formula_moiety          ? 
_chemical_formula_sum 
 'C66 H62 Cl2 N4 O6' 
_chemical_formula_weight          1078.10 
  
loop_ 
 _atom_type_symbol 
 _atom_type_description 
 _atom_type_scat_dispersion_real 
 _atom_type_scat_dispersion_imag 
 _atom_type_scat_source 
 'C'  'C'   0.0033   0.0016 
 'International Tables Vol C Tables 4.2.6.8 and 6.1.1.4' 
 'H'  'H'   0.0000   0.0000 
 'International Tables Vol C Tables 4.2.6.8 and 6.1.1.4' 
 'N'  'N'   0.0061   0.0033 
 'International Tables Vol C Tables 4.2.6.8 and 6.1.1.4' 
 'O'  'O'   0.0106   0.0060 
 'International Tables Vol C Tables 4.2.6.8 and 6.1.1.4' 
 'Cl'  'Cl'   0.1484   0.1585 
 'International Tables Vol C Tables 4.2.6.8 and 6.1.1.4' 
  
_symmetry_cell_setting            Triclinic 
_symmetry_space_group_name_H-M    P-1 
  
loop_ 
 _symmetry_equiv_pos_as_xyz 
 'x, y, z' 
 '-x, -y, -z' 
  
_cell_length_a                    13.2763(14) 
_cell_length_b                    13.5303(14) 
_cell_length_c                    17.5500(18) 
_cell_angle_alpha                 68.543(2) 
_cell_angle_beta                  89.669(2) 
_cell_angle_gamma                 72.898(2) 
_cell_volume                      2785.9(5) 
_cell_formula_units_Z             2 
_cell_measurement_temperature     100(2) 
_cell_measurement_reflns_used     9908 
_cell_measurement_theta_min       2.44 
_cell_measurement_theta_max       30.46 
  
_exptl_crystal_description        rod 
_exptl_crystal_colour             purple 
_exptl_crystal_size_max           0.50 
_exptl_crystal_size_mid           0.20 
_exptl_crystal_size_min           0.20 
_exptl_crystal_density_meas       ? 
_exptl_crystal_density_diffrn     1.285 
_exptl_crystal_density_method     'not measured' 
_exptl_crystal_F_000              1136 
_exptl_absorpt_coefficient_mu     0.174 
_exptl_absorpt_correction_type    multi-scan 
_exptl_absorpt_correction_T_min   0.9179 
_exptl_absorpt_correction_T_max   0.9660 
_exptl_absorpt_process_details    sadabs 
  
_exptl_special_details 
; 
 ? 
; 
  
_diffrn_ambient_temperature       100(2) 
_diffrn_radiation_wavelength      0.71073 
_diffrn_radiation_type            MoK\a 
_diffrn_radiation_source          'fine-focus sealed tube' 
_diffrn_radiation_monochromator   graphite 
_diffrn_measurement_device_type   'Bruker APEX-II CCD' 
_diffrn_measurement_method        '\f and \w scans' 
_diffrn_detector_area_resol_mean  ? 
_diffrn_reflns_number             64327 
_diffrn_reflns_av_R_equivalents   0.0684 
_diffrn_reflns_av_sigmaI/netI     0.0719 
_diffrn_reflns_limit_h_min        -18 
_diffrn_reflns_limit_h_max        18 
_diffrn_reflns_limit_k_min        -19 
_diffrn_reflns_limit_k_max        19 
_diffrn_reflns_limit_l_min        -24 
_diffrn_reflns_limit_l_max        24 
_diffrn_reflns_theta_min          1.25 
_diffrn_reflns_theta_max          30.03 
_reflns_number_total              16105 
_reflns_number_gt                 10116 
_reflns_threshold_expression      >2sigma(I) 
  
_computing_data_collection        'Bruker APEX2' 
_computing_cell_refinement        'Bruker SAINT' 
_computing_data_reduction         'Bruker SAINT' 
_computing_structure_solution     'SHELXS-97 (Sheldrick, 2008)' 
_computing_structure_refinement   'SHELXL-97 (Sheldrick, 2008)' 
_computing_molecular_graphics     'Bruker SHELXTL' 
_computing_publication_material   'Bruker SHELXTL' 
  
_refine_special_details 
; 
 Refinement of F^2^ against ALL reflections.  The weighted R-factor wR and 
 goodness of fit S are based on F^2^, conventional R-factors R are based 
 on F, with F set to zero for negative F^2^. The threshold expression of 
 F^2^ > 2sigma(F^2^) is used only for calculating R-factors(gt) etc. and is 
 not relevant to the choice of reflections for refinement.  R-factors based 
 on F^2^ are statistically about twice as large as those based on F, and R- 
 factors based on ALL data will be even larger. 
; 
  
_refine_ls_structure_factor_coef  Fsqd 
_refine_ls_matrix_type            full 
_refine_ls_weighting_scheme       calc 
_refine_ls_weighting_details 
 'calc w=1/[\s^2^(Fo^2^)+(0.1045P)^2^+2.4304P] where P=(Fo^2^+2Fc^2^)/3' 
_atom_sites_solution_primary      direct 
_atom_sites_solution_secondary    difmap 
_atom_sites_solution_hydrogens    geom 
_refine_ls_hydrogen_treatment     mixed 
_refine_ls_extinction_method      none 
_refine_ls_extinction_coef        ? 
_refine_ls_number_reflns          16105 
_refine_ls_number_parameters      742 
_refine_ls_number_restraints      34 
_refine_ls_R_factor_all           0.1221 
_refine_ls_R_factor_gt            0.0748 
_refine_ls_wR_factor_ref          0.2279 
_refine_ls_wR_factor_gt           0.1955 
_refine_ls_goodness_of_fit_ref    1.047 
_refine_ls_restrained_S_all       1.049 
_refine_ls_shift/su_max           0.001 
_refine_ls_shift/su_mean          0.000 
  
loop_ 
 _atom_site_label 
 _atom_site_type_symbol 
 _atom_site_fract_x 
 _atom_site_fract_y 
 _atom_site_fract_z 
 _atom_site_U_iso_or_equiv 
 _atom_site_adp_type 
 _atom_site_occupancy 
 _atom_site_symmetry_multiplicity 
 _atom_site_calc_flag 
 _atom_site_refinement_flags 
 _atom_site_disorder_assembly 
 _atom_site_disorder_group 
N1 N 0.11148(16) 0.65335(16) -0.41551(11) 0.0180(4) Uani 1 1 d . . . 
N2 N -0.08323(16) 0.84430(17) -0.46788(12) 0.0195(4) Uani 1 1 d D . . 
H2N H -0.040(2) 0.810(2) -0.4230(13) 0.023 Uiso 1 1 d D . . 
N3 N -0.04379(16) 0.88292(17) -0.32054(12) 0.0187(4) Uani 1 1 d . . . 
N4 N 0.15111(16) 0.69030(17) -0.26805(12) 0.0182(4) Uani 1 1 d D . . 
H4N H 0.107(2) 0.729(2) -0.3142(13) 0.022 Uiso 1 1 d D . . 
O1 O 0.41148(17) 0.84918(19) -0.24988(16) 0.0445(6) Uani 1 1 d . . . 
O2 O 0.35339(15) 0.77393(15) -0.32491(11) 0.0250(4) Uani 1 1 d D . . 
H2O H 0.374(2) 0.7143(19) -0.3315(19) 0.030 Uiso 1 1 d D . . 
O3 O 0.46518(13) 0.56386(13) -0.29553(10) 0.0193(3) Uani 1 1 d . . . 
O4 O 0.16554(15) 0.96591(15) 0.05333(10) 0.0249(4) Uani 1 1 d . . . 
O5 O -0.59838(14) 1.33270(16) -0.52924(12) 0.0289(4) Uani 1 1 d . . . 
O6 O -0.07165(17) 0.70877(19) -0.86061(11) 0.0342(5) Uani 1 1 d . . . 
Cl1S Cl 0.55392(14) 0.74365(12) 0.00419(10) 0.0977(5) Uani 1 1 d DU . . 
Cl2S Cl 0.41947(10) 0.60377(11) 0.03840(6) 0.0481(4) Uani 0.756(3) 1 d PDU A 1 
C1S C 0.4790(4) 0.6860(4) -0.0380(3) 0.0550(13) Uani 0.756(3) 1 d PDU A 1 
H1S1 H 0.5253 0.6394 -0.0647 0.066 Uiso 0.756(3) 1 calc PR A 1 
H1S2 H 0.4234 0.7467 -0.0806 0.066 Uiso 0.756(3) 1 calc PR A 1 
C1SA C 0.4704(10) 0.6588(10) 0.0177(9) 0.067(4) Uani 0.244(3) 1 d PDU A 2 
H1S3 H 0.4619 0.6263 0.0770 0.081 Uiso 0.244(3) 1 calc PR A 2 
H1S4 H 0.3994 0.7060 -0.0124 0.081 Uiso 0.244(3) 1 calc PR A 2 
Cl3S Cl 0.5203(10) 0.5513(8) -0.0173(7) 0.164(4) Uani 0.244(3) 1 d PDU . 2 
C1 C 0.26429(18) 0.54011(19) -0.30823(14) 0.0171(4) Uani 1 1 d . . . 
C2 C 0.20641(18) 0.57000(19) -0.38461(14) 0.0173(4) Uani 1 1 d . . . 
C3 C 0.2416(2) 0.5151(2) -0.44194(14) 0.0200(5) Uani 1 1 d . . . 
H3 H 0.3050 0.4556 -0.4350 0.024 Uiso 1 1 calc R . . 
C4 C 0.16540(19) 0.5665(2) -0.50723(14) 0.0206(5) Uani 1 1 d . . . 
H4 H 0.1650 0.5491 -0.5550 0.025 Uiso 1 1 calc R . . 
C5 C 0.08467(19) 0.6526(2) -0.49084(14) 0.0180(4) Uani 1 1 d . . . 
C6 C -0.00453(19) 0.7269(2) -0.54705(14) 0.0178(4) Uani 1 1 d . . . 
C7 C -0.08089(19) 0.8152(2) -0.53558(14) 0.0183(5) Uani 1 1 d . . . 
C8 C -0.17232(19) 0.8926(2) -0.59215(14) 0.0207(5) Uani 1 1 d . . . 
H8 H -0.1913 0.8934 -0.6445 0.025 Uiso 1 1 calc R . . 
C9 C -0.2273(2) 0.9647(2) -0.55754(14) 0.0214(5) Uani 1 1 d . . . 
H9 H -0.2913 1.0244 -0.5815 0.026 Uiso 1 1 calc R . . 
C10 C -0.17155(19) 0.9346(2) -0.47870(14) 0.0197(5) Uani 1 1 d . . . 
C11 C -0.20108(19) 0.9901(2) -0.42448(14) 0.0189(5) Uani 1 1 d . . . 
C12 C -0.14020(19) 0.9652(2) -0.35072(14) 0.0191(5) Uani 1 1 d . . . 
C13 C -0.17060(19) 1.0246(2) -0.29567(14) 0.0197(5) Uani 1 1 d . . . 
H13 H -0.2340 1.0839 -0.3022 0.024 Uiso 1 1 calc R . . 
C14 C -0.09070(19) 0.9787(2) -0.23303(14) 0.0194(5) Uani 1 1 d . . . 
H14 H -0.0867 1.0005 -0.1877 0.023 Uiso 1 1 calc R . . 
C15 C -0.01240(19) 0.8897(2) -0.24906(14) 0.0180(4) Uani 1 1 d . . . 
C16 C 0.08094(18) 0.8191(2) -0.19600(14) 0.0177(4) Uani 1 1 d . . . 
C17 C 0.15279(19) 0.7255(2) -0.20419(14) 0.0181(4) Uani 1 1 d . . . 
C18 C 0.24079(19) 0.6462(2) -0.14497(14) 0.0211(5) Uani 1 1 d . . . 
H18 H 0.2609 0.6487 -0.0940 0.025 Uiso 1 1 calc R . . 
C19 C 0.29068(19) 0.5663(2) -0.17481(14) 0.0205(5) Uani 1 1 d . . . 
H19 H 0.3511 0.5031 -0.1481 0.025 Uiso 1 1 calc R . . 
C20 C 0.23531(19) 0.5952(2) -0.25372(14) 0.0183(4) Uani 1 1 d . . . 
C21 C 0.10917(19) 0.8498(2) -0.12694(14) 0.0188(5) Uani 1 1 d . . . 
C22 C 0.0577(2) 0.8314(2) -0.05588(15) 0.0223(5) Uani 1 1 d . . . 
H22 H 0.0072 0.7924 -0.0481 0.027 Uiso 1 1 calc R . . 
C23 C 0.0794(2) 0.8695(2) 0.00354(15) 0.0233(5) Uani 1 1 d . . . 
H23 H 0.0439 0.8563 0.0517 0.028 Uiso 1 1 calc R . . 
C24 C 0.1529(2) 0.9268(2) -0.00712(14) 0.0202(5) Uani 1 1 d . . . 
C25 C 0.2073(2) 0.9431(2) -0.07603(15) 0.0231(5) Uani 1 1 d . . . 
H25 H 0.2591 0.9805 -0.0829 0.028 Uiso 1 1 calc R . . 
C26 C 0.1850(2) 0.9039(2) -0.13525(15) 0.0236(5) Uani 1 1 d . . . 
H26 H 0.2226 0.9145 -0.1823 0.028 Uiso 1 1 calc R . . 
C31 C -0.30597(19) 1.0803(2) -0.44778(14) 0.0202(5) Uani 1 1 d . . . 
C32 C -0.3145(2) 1.1936(2) -0.47118(15) 0.0229(5) Uani 1 1 d . . . 
H32 H -0.2525 1.2145 -0.4694 0.027 Uiso 1 1 calc R . . 
C33 C -0.4132(2) 1.2757(2) -0.49695(16) 0.0242(5) Uani 1 1 d . . . 
H33 H -0.4181 1.3521 -0.5122 0.029 Uiso 1 1 calc R . . 
C34 C -0.5047(2) 1.2463(2) -0.50044(15) 0.0231(5) Uani 1 1 d . . . 
C35 C -0.4980(2) 1.1342(2) -0.47508(16) 0.0239(5) Uani 1 1 d . . . 
H35 H -0.5603 1.1134 -0.4754 0.029 Uiso 1 1 calc R . . 
C36 C -0.3990(2) 1.0529(2) -0.44921(15) 0.0231(5) Uani 1 1 d . . . 
H36 H -0.3948 0.9764 -0.4320 0.028 Uiso 1 1 calc R . . 
C41 C -0.01887(18) 0.7158(2) -0.62808(13) 0.0175(4) Uani 1 1 d . . . 
C42 C -0.0138(2) 0.8015(2) -0.70095(14) 0.0211(5) Uani 1 1 d . . . 
H42 H 0.0018 0.8644 -0.6984 0.025 Uiso 1 1 calc R . . 
C43 C -0.0312(2) 0.7965(2) -0.77727(15) 0.0236(5) Uani 1 1 d . . . 
H43 H -0.0271 0.8556 -0.8262 0.028 Uiso 1 1 calc R . . 
C44 C -0.0547(2) 0.7050(2) -0.78195(15) 0.0243(5) Uani 1 1 d . . . 
C45 C -0.0575(2) 0.6176(2) -0.71011(15) 0.0239(5) Uani 1 1 d . . . 
H45 H -0.0715 0.5539 -0.7128 0.029 Uiso 1 1 calc R . . 
C46 C -0.0396(2) 0.6236(2) -0.63379(15) 0.0220(5) Uani 1 1 d . . . 
H46 H -0.0415 0.5635 -0.5848 0.026 Uiso 1 1 calc R . . 
C51 C 0.54926(19) 0.5790(2) -0.25964(14) 0.0183(4) Uani 1 1 d . . . 
C52 C 0.5323(2) 0.6820(2) -0.25205(15) 0.0208(5) Uani 1 1 d . . . 
C53 C 0.6174(2) 0.7000(2) -0.21828(15) 0.0232(5) Uani 1 1 d . . . 
H53 H 0.6069 0.7695 -0.2129 0.028 Uiso 1 1 calc R . . 
C54 C 0.7160(2) 0.6199(2) -0.19255(16) 0.0238(5) Uani 1 1 d . . . 
C55 C 0.7277(2) 0.5172(2) -0.19973(15) 0.0228(5) Uani 1 1 d . . . 
H55 H 0.7947 0.4606 -0.1812 0.027 Uiso 1 1 calc R . . 
C56 C 0.64666(19) 0.4941(2) -0.23253(14) 0.0189(5) Uani 1 1 d . . . 
C57 C 0.66286(19) 0.3842(2) -0.24438(15) 0.0194(5) Uani 1 1 d . . . 
C58 C 0.55584(18) 0.36457(19) -0.24713(14) 0.0174(4) Uani 1 1 d . . . 
C59 C 0.54644(19) 0.2583(2) -0.22860(14) 0.0194(5) Uani 1 1 d . . . 
H59 H 0.6087 0.1954 -0.2087 0.023 Uiso 1 1 calc R . . 
C60 C 0.45013(19) 0.2403(2) -0.23794(14) 0.0186(5) Uani 1 1 d . . . 
C61 C 0.35898(19) 0.3340(2) -0.26484(14) 0.0184(4) Uani 1 1 d . . . 
H61 H 0.2922 0.3240 -0.2714 0.022 Uiso 1 1 calc R . . 
C62 C 0.36342(18) 0.44201(19) -0.28225(13) 0.0172(4) Uani 1 1 d . . . 
C63 C 0.46269(19) 0.45459(19) -0.27374(13) 0.0169(4) Uani 1 1 d . . . 
C64 C 0.7434(2) 0.2863(2) -0.17620(18) 0.0285(6) Uani 1 1 d . . . 
H64A H 0.7169 0.2776 -0.1226 0.043 Uiso 1 1 calc R . . 
H64B H 0.8113 0.3012 -0.1763 0.043 Uiso 1 1 calc R . . 
H64C H 0.7534 0.2174 -0.1861 0.043 Uiso 1 1 calc R . . 
C65 C 0.7057(2) 0.3958(2) -0.32788(17) 0.0283(6) Uani 1 1 d . . . 
H65A H 0.7149 0.3267 -0.3372 0.042 Uiso 1 1 calc R . . 
H65B H 0.7742 0.4094 -0.3275 0.042 Uiso 1 1 calc R . . 
H65C H 0.6553 0.4586 -0.3721 0.042 Uiso 1 1 calc R . . 
C66 C 0.4287(2) 0.7738(2) -0.27506(16) 0.0246(5) Uani 1 1 d . . . 
C101 C 0.8122(2) 0.6391(2) -0.15913(19) 0.0318(6) Uani 1 1 d . . . 
C102 C 0.8578(3) 0.5472(3) -0.0740(2) 0.0464(9) Uani 1 1 d . . . 
H10A H 0.8036 0.5495 -0.0360 0.070 Uiso 1 1 calc R . . 
H10B H 0.9195 0.5594 -0.0531 0.070 Uiso 1 1 calc R . . 
H10C H 0.8794 0.4740 -0.0786 0.070 Uiso 1 1 calc R . . 
C103 C 0.8952(3) 0.6361(3) -0.2209(2) 0.0433(8) Uani 1 1 d . . . 
H10D H 0.9141 0.5642 -0.2274 0.065 Uiso 1 1 calc R . . 
H10E H 0.9588 0.6455 -0.2003 0.065 Uiso 1 1 calc R . . 
H10F H 0.8655 0.6968 -0.2744 0.065 Uiso 1 1 calc R . . 
C104 C 0.7830(2) 0.7535(3) -0.1514(2) 0.0403(7) Uani 1 1 d . . . 
H10G H 0.7529 0.8128 -0.2054 0.060 Uiso 1 1 calc R . . 
H10H H 0.8467 0.7637 -0.1319 0.060 Uiso 1 1 calc R . . 
H10I H 0.7306 0.7568 -0.1121 0.060 Uiso 1 1 calc R . . 
C111 C 0.44360(19) 0.1217(2) -0.21467(16) 0.0216(5) Uani 1 1 d . . . 
C112 C 0.5420(2) 0.0464(2) -0.23517(19) 0.0308(6) Uani 1 1 d . . . 
H11A H 0.6047 0.0365 -0.2007 0.046 Uiso 1 1 calc R . . 
H11B H 0.5511 0.0812 -0.2934 0.046 Uiso 1 1 calc R . . 
H11C H 0.5329 -0.0266 -0.2246 0.046 Uiso 1 1 calc R . . 
C113 C 0.3453(2) 0.1224(2) -0.26057(19) 0.0323(6) Uani 1 1 d . . . 
H11D H 0.3472 0.0453 -0.2491 0.048 Uiso 1 1 calc R . . 
H11E H 0.3446 0.1616 -0.3200 0.048 Uiso 1 1 calc R . . 
H11F H 0.2812 0.1609 -0.2420 0.048 Uiso 1 1 calc R . . 
C114 C 0.4377(2) 0.0730(2) -0.12163(18) 0.0322(6) Uani 1 1 d . . . 
H11G H 0.4993 0.0749 -0.0923 0.048 Uiso 1 1 calc R . . 
H11H H 0.4376 -0.0045 -0.1048 0.048 Uiso 1 1 calc R . . 
H11I H 0.3725 0.1175 -0.1084 0.048 Uiso 1 1 calc R . . 
C200 C 0.2310(2) 1.0352(3) 0.03998(18) 0.0322(6) Uani 1 1 d . . . 
H20A H 0.3034 0.9933 0.0357 0.048 Uiso 1 1 calc R . . 
H20B H 0.2316 1.0593 0.0862 0.048 Uiso 1 1 calc R . . 
H20C H 0.2034 1.1010 -0.0112 0.048 Uiso 1 1 calc R . . 
C300 C -0.6893(2) 1.3063(3) -0.5469(2) 0.0351(7) Uani 1 1 d . . . 
H30A H -0.6734 1.2661 -0.5842 0.053 Uiso 1 1 calc R . . 
H30B H -0.7484 1.3755 -0.5731 0.053 Uiso 1 1 calc R . . 
H30C H -0.7088 1.2591 -0.4955 0.053 Uiso 1 1 calc R . . 
C400 C -0.1278(2) 0.6392(3) -0.87117(17) 0.0319(6) Uani 1 1 d . . . 
H40A H -0.0833 0.5608 -0.8463 0.048 Uiso 1 1 calc R . . 
H40B H -0.1459 0.6593 -0.9301 0.048 Uiso 1 1 calc R . . 
H40C H -0.1930 0.6494 -0.8444 0.048 Uiso 1 1 calc R . . 
  
loop_ 
 _atom_site_aniso_label 
 _atom_site_aniso_U_11 
 _atom_site_aniso_U_22 
 _atom_site_aniso_U_33 
 _atom_site_aniso_U_23 
 _atom_site_aniso_U_13 
 _atom_site_aniso_U_12 
N1 0.0162(10) 0.0162(10) 0.0180(9) -0.0058(7) -0.0013(7) -0.0008(8) 
N2 0.0184(10) 0.0168(10) 0.0198(9) -0.0082(8) -0.0039(7) 0.0010(8) 
N3 0.0156(10) 0.0179(10) 0.0212(9) -0.0086(8) -0.0005(7) -0.0015(8) 
N4 0.0165(10) 0.0180(10) 0.0182(9) -0.0089(7) -0.0018(7) 0.0002(8) 
O1 0.0283(12) 0.0318(12) 0.0804(17) -0.0378(12) -0.0057(11) 0.0018(10) 
O2 0.0215(9) 0.0153(9) 0.0335(10) -0.0091(7) -0.0044(7) 0.0011(7) 
O3 0.0185(9) 0.0110(8) 0.0251(8) -0.0053(6) -0.0030(6) -0.0019(7) 
O4 0.0282(10) 0.0252(10) 0.0229(8) -0.0142(7) -0.0008(7) -0.0039(8) 
O5 0.0174(9) 0.0211(9) 0.0424(11) -0.0130(8) -0.0033(7) 0.0033(7) 
O6 0.0424(12) 0.0466(13) 0.0229(9) -0.0186(9) 0.0052(8) -0.0202(10) 
Cl1S 0.1227(13) 0.0669(8) 0.0962(10) -0.0208(7) 0.0046(9) -0.0324(9) 
Cl2S 0.0483(7) 0.0569(8) 0.0337(6) -0.0165(5) 0.0022(4) -0.0096(6) 
C1S 0.063(3) 0.057(3) 0.036(2) -0.012(2) 0.007(2) -0.014(3) 
C1SA 0.045(8) 0.087(10) 0.029(7) 0.011(6) 0.026(6) -0.006(7) 
Cl3S 0.222(11) 0.109(6) 0.170(9) -0.058(6) 0.014(8) -0.059(7) 
C1 0.0131(11) 0.0136(11) 0.0229(11) -0.0073(8) -0.0007(8) -0.0013(9) 
C2 0.0158(11) 0.0146(11) 0.0195(10) -0.0072(8) -0.0003(8) -0.0011(9) 
C3 0.0181(12) 0.0184(12) 0.0221(11) -0.0101(9) 0.0017(8) -0.0004(9) 
C4 0.0196(12) 0.0205(12) 0.0208(11) -0.0104(9) 0.0021(8) -0.0019(10) 
C5 0.0165(11) 0.0154(11) 0.0215(11) -0.0086(8) 0.0010(8) -0.0020(9) 
C6 0.0165(11) 0.0171(11) 0.0189(10) -0.0072(8) 0.0005(8) -0.0035(9) 
C7 0.0168(11) 0.0169(11) 0.0199(10) -0.0081(9) -0.0012(8) -0.0019(9) 
C8 0.0186(12) 0.0201(12) 0.0212(11) -0.0081(9) -0.0030(8) -0.0024(10) 
C9 0.0178(12) 0.0181(12) 0.0238(11) -0.0076(9) -0.0044(9) 0.0007(9) 
C10 0.0167(12) 0.0165(11) 0.0221(11) -0.0071(9) -0.0018(8) 0.0002(9) 
C11 0.0147(11) 0.0153(11) 0.0231(11) -0.0067(9) -0.0016(8) -0.0001(9) 
C12 0.0173(12) 0.0159(11) 0.0230(11) -0.0089(9) 0.0010(8) -0.0017(9) 
C13 0.0177(12) 0.0177(12) 0.0235(11) -0.0100(9) 0.0016(8) -0.0026(9) 
C14 0.0191(12) 0.0162(11) 0.0224(11) -0.0093(9) 0.0015(8) -0.0025(9) 
C15 0.0154(11) 0.0176(11) 0.0215(11) -0.0098(9) 0.0016(8) -0.0030(9) 
C16 0.0158(11) 0.0175(11) 0.0204(10) -0.0096(9) 0.0023(8) -0.0031(9) 
C17 0.0160(11) 0.0180(11) 0.0196(10) -0.0087(9) -0.0010(8) -0.0022(9) 
C18 0.0185(12) 0.0217(12) 0.0204(11) -0.0091(9) -0.0027(8) -0.0010(10) 
C19 0.0179(12) 0.0167(11) 0.0219(11) -0.0067(9) -0.0035(8) 0.0013(9) 
C20 0.0159(11) 0.0153(11) 0.0228(11) -0.0080(9) 0.0003(8) -0.0027(9) 
C21 0.0162(11) 0.0184(12) 0.0202(11) -0.0102(9) -0.0011(8) 0.0007(9) 
C22 0.0185(12) 0.0263(13) 0.0228(11) -0.0106(10) 0.0018(9) -0.0065(10) 
C23 0.0221(13) 0.0268(13) 0.0203(11) -0.0114(10) 0.0042(9) -0.0035(10) 
C24 0.0199(12) 0.0175(12) 0.0197(11) -0.0083(9) -0.0033(8) 0.0009(9) 
C25 0.0224(13) 0.0255(13) 0.0251(12) -0.0131(10) 0.0020(9) -0.0083(10) 
C26 0.0255(13) 0.0263(13) 0.0233(11) -0.0130(10) 0.0051(9) -0.0098(11) 
C31 0.0176(12) 0.0199(12) 0.0215(11) -0.0106(9) -0.0023(8) 0.0000(9) 
C32 0.0207(13) 0.0201(12) 0.0260(12) -0.0092(9) -0.0016(9) -0.0031(10) 
C33 0.0218(13) 0.0172(12) 0.0309(13) -0.0105(10) -0.0010(10) -0.0005(10) 
C34 0.0189(12) 0.0204(13) 0.0261(12) -0.0107(10) -0.0013(9) 0.0020(10) 
C35 0.0175(12) 0.0220(13) 0.0317(13) -0.0125(10) -0.0006(9) -0.0025(10) 
C36 0.0204(13) 0.0164(12) 0.0306(13) -0.0108(10) -0.0022(9) -0.0004(10) 
C41 0.0134(11) 0.0183(11) 0.0190(10) -0.0091(9) -0.0010(8) 0.0002(9) 
C42 0.0213(12) 0.0185(12) 0.0230(11) -0.0089(9) 0.0015(9) -0.0044(10) 
C43 0.0223(13) 0.0245(13) 0.0201(11) -0.0065(9) 0.0035(9) -0.0044(10) 
C44 0.0201(12) 0.0336(14) 0.0219(11) -0.0152(10) 0.0029(9) -0.0063(11) 
C45 0.0229(13) 0.0247(13) 0.0281(12) -0.0146(10) 0.0022(9) -0.0071(11) 
C46 0.0207(12) 0.0214(12) 0.0217(11) -0.0066(9) 0.0014(9) -0.0055(10) 
C51 0.0171(11) 0.0162(11) 0.0208(11) -0.0063(8) 0.0017(8) -0.0049(9) 
C52 0.0183(12) 0.0181(12) 0.0253(11) -0.0092(9) 0.0007(9) -0.0033(10) 
C53 0.0200(12) 0.0202(12) 0.0306(13) -0.0111(10) 0.0023(9) -0.0061(10) 
C54 0.0178(12) 0.0217(13) 0.0323(13) -0.0110(10) 0.0010(9) -0.0059(10) 
C55 0.0173(12) 0.0182(12) 0.0292(12) -0.0076(9) -0.0001(9) -0.0019(10) 
C56 0.0169(12) 0.0151(11) 0.0217(11) -0.0051(8) 0.0007(8) -0.0030(9) 
C57 0.0145(11) 0.0147(11) 0.0271(12) -0.0074(9) 0.0008(8) -0.0026(9) 
C58 0.0146(11) 0.0165(11) 0.0191(10) -0.0071(8) -0.0002(8) -0.0017(9) 
C59 0.0176(12) 0.0147(11) 0.0227(11) -0.0070(9) -0.0012(8) -0.0007(9) 
C60 0.0179(12) 0.0146(11) 0.0225(11) -0.0085(9) 0.0009(8) -0.0022(9) 
C61 0.0154(11) 0.0186(12) 0.0215(11) -0.0095(9) -0.0003(8) -0.0032(9) 
C62 0.0159(11) 0.0156(11) 0.0183(10) -0.0075(8) -0.0010(8) -0.0008(9) 
C63 0.0182(11) 0.0129(11) 0.0180(10) -0.0059(8) -0.0004(8) -0.0024(9) 
C64 0.0164(13) 0.0190(13) 0.0440(15) -0.0081(11) -0.0068(10) -0.0014(10) 
C65 0.0257(14) 0.0258(14) 0.0359(14) -0.0150(11) 0.0103(11) -0.0076(11) 
C66 0.0195(13) 0.0180(12) 0.0361(14) -0.0113(10) 0.0003(10) -0.0040(10) 
C101 0.0206(14) 0.0254(14) 0.0517(17) -0.0186(12) -0.0038(11) -0.0051(11) 
C102 0.0394(19) 0.0393(19) 0.058(2) -0.0182(16) -0.0207(15) -0.0089(15) 
C103 0.0241(16) 0.0382(18) 0.078(2) -0.0296(17) 0.0115(15) -0.0155(14) 
C104 0.0258(16) 0.0345(17) 0.070(2) -0.0297(16) -0.0040(14) -0.0104(13) 
C111 0.0149(12) 0.0143(11) 0.0350(13) -0.0115(10) -0.0012(9) -0.0010(9) 
C112 0.0225(14) 0.0212(14) 0.0515(17) -0.0204(12) 0.0019(11) -0.0023(11) 
C113 0.0244(14) 0.0206(13) 0.0526(17) -0.0160(12) -0.0079(12) -0.0053(11) 
C114 0.0321(16) 0.0226(14) 0.0382(15) -0.0066(11) 0.0037(11) -0.0097(12) 
C200 0.0340(16) 0.0356(16) 0.0340(14) -0.0210(12) -0.0011(11) -0.0108(13) 
C300 0.0180(14) 0.0268(15) 0.0537(18) -0.0139(13) -0.0053(12) 0.0013(11) 
C400 0.0321(15) 0.0392(16) 0.0288(13) -0.0191(12) -0.0023(11) -0.0093(13) 
  
_geom_special_details 
; 
 All esds (except the esd in the dihedral angle between two l.s. planes) 
 are estimated using the full covariance matrix.  The cell esds are taken 
 into account individually in the estimation of esds in distances, angles 
 and torsion angles; correlations between esds in cell parameters are only 
 used when they are defined by crystal symmetry.  An approximate (isotropic) 
 treatment of cell esds is used for estimating esds involving l.s. planes. 
; 
  
loop_ 
 _geom_bond_atom_site_label_1 
 _geom_bond_atom_site_label_2 
 _geom_bond_distance 
 _geom_bond_site_symmetry_2 
 _geom_bond_publ_flag 
N1 C2 1.371(3) . ? 
N1 C5 1.375(3) . ? 
N2 C10 1.376(3) . ? 
N2 C7 1.379(3) . ? 
N3 C15 1.367(3) . ? 
N3 C12 1.377(3) . ? 
N4 C17 1.372(3) . ? 
N4 C20 1.374(3) . ? 
O1 C66 1.216(3) . ? 
O2 C66 1.332(3) . ? 
O3 C51 1.387(3) . ? 
O3 C63 1.396(3) . ? 
O4 C24 1.378(3) . ? 
O4 C200 1.417(3) . ? 
O5 C34 1.374(3) . ? 
O5 C300 1.421(3) . ? 
O6 C44 1.380(3) . ? 
O6 C400 1.421(3) . ? 
Cl1S C1S 1.742(5) . ? 
Cl1S C1SA 1.775(8) . ? 
Cl2S C1S 1.753(4) . ? 
C1SA Cl3S 1.735(8) . ? 
Cl3S Cl3S 1.55(2) 2_665 ? 
C1 C20 1.403(3) . ? 
C1 C2 1.408(3) . ? 
C1 C62 1.496(3) . ? 
C2 C3 1.456(3) . ? 
C3 C4 1.356(3) . ? 
C4 C5 1.448(3) . ? 
C5 C6 1.405(3) . ? 
C6 C7 1.399(3) . ? 
C6 C41 1.503(3) . ? 
C7 C8 1.436(3) . ? 
C8 C9 1.365(3) . ? 
C9 C10 1.432(3) . ? 
C10 C11 1.403(3) . ? 
C11 C12 1.406(3) . ? 
C11 C31 1.496(3) . ? 
C12 C13 1.454(3) . ? 
C13 C14 1.359(3) . ? 
C14 C15 1.455(3) . ? 
C15 C16 1.408(3) . ? 
C16 C17 1.398(3) . ? 
C16 C21 1.499(3) . ? 
C17 C18 1.434(3) . ? 
C18 C19 1.368(3) . ? 
C19 C20 1.434(3) . ? 
C21 C26 1.387(4) . ? 
C21 C22 1.395(3) . ? 
C22 C23 1.385(3) . ? 
C23 C24 1.388(4) . ? 
C24 C25 1.386(3) . ? 
C25 C26 1.396(3) . ? 
C31 C36 1.393(4) . ? 
C31 C32 1.404(4) . ? 
C32 C33 1.392(3) . ? 
C33 C34 1.393(4) . ? 
C34 C35 1.390(4) . ? 
C35 C36 1.391(3) . ? 
C41 C46 1.391(3) . ? 
C41 C42 1.395(3) . ? 
C42 C43 1.389(3) . ? 
C43 C44 1.393(4) . ? 
C44 C45 1.387(4) . ? 
C45 C46 1.397(3) . ? 
C51 C56 1.397(3) . ? 
C51 C52 1.400(3) . ? 
C52 C53 1.400(3) . ? 
C52 C66 1.494(3) . ? 
C53 C54 1.381(4) . ? 
C54 C55 1.404(4) . ? 
C54 C101 1.535(4) . ? 
C55 C56 1.387(3) . ? 
C56 C57 1.529(3) . ? 
C57 C58 1.524(3) . ? 
C57 C64 1.534(3) . ? 
C57 C65 1.540(4) . ? 
C58 C63 1.391(3) . ? 
C58 C59 1.397(3) . ? 
C59 C60 1.391(3) . ? 
C60 C61 1.401(3) . ? 
C60 C111 1.533(3) . ? 
C61 C62 1.398(3) . ? 
C62 C63 1.393(3) . ? 
C101 C102 1.533(4) . ? 
C101 C104 1.537(4) . ? 
C101 C103 1.545(4) . ? 
C111 C114 1.532(4) . ? 
C111 C113 1.533(3) . ? 
C111 C112 1.534(4) . ? 
  
loop_ 
 _geom_angle_atom_site_label_1 
 _geom_angle_atom_site_label_2 
 _geom_angle_atom_site_label_3 
 _geom_angle 
 _geom_angle_site_symmetry_1 
 _geom_angle_site_symmetry_3 
 _geom_angle_publ_flag 
C2 N1 C5 105.61(19) . . ? 
C10 N2 C7 109.72(19) . . ? 
C15 N3 C12 105.73(19) . . ? 
C17 N4 C20 109.67(19) . . ? 
C51 O3 C63 117.59(18) . . ? 
C24 O4 C200 117.4(2) . . ? 
C34 O5 C300 117.3(2) . . ? 
C44 O6 C400 117.5(2) . . ? 
C1S Cl1S C1SA 30.6(4) . . ? 
Cl1S C1S Cl2S 110.8(3) . . ? 
Cl3S C1SA Cl1S 112.5(7) . . ? 
Cl3S Cl3S C1SA 117.5(11) 2_665 . ? 
C20 C1 C2 124.7(2) . . ? 
C20 C1 C62 117.1(2) . . ? 
C2 C1 C62 118.2(2) . . ? 
N1 C2 C1 125.7(2) . . ? 
N1 C2 C3 110.93(19) . . ? 
C1 C2 C3 123.4(2) . . ? 
C4 C3 C2 105.8(2) . . ? 
C3 C4 C5 107.5(2) . . ? 
N1 C5 C6 126.3(2) . . ? 
N1 C5 C4 110.2(2) . . ? 
C6 C5 C4 123.5(2) . . ? 
C7 C6 C5 125.3(2) . . ? 
C7 C6 C41 115.9(2) . . ? 
C5 C6 C41 118.7(2) . . ? 
N2 C7 C6 126.7(2) . . ? 
N2 C7 C8 106.9(2) . . ? 
C6 C7 C8 126.3(2) . . ? 
C9 C8 C7 108.1(2) . . ? 
C8 C9 C10 108.0(2) . . ? 
N2 C10 C11 127.1(2) . . ? 
N2 C10 C9 107.3(2) . . ? 
C11 C10 C9 125.6(2) . . ? 
C10 C11 C12 124.6(2) . . ? 
C10 C11 C31 116.3(2) . . ? 
C12 C11 C31 119.1(2) . . ? 
N3 C12 C11 125.4(2) . . ? 
N3 C12 C13 110.4(2) . . ? 
C11 C12 C13 124.2(2) . . ? 
C14 C13 C12 106.7(2) . . ? 
C13 C14 C15 106.4(2) . . ? 
N3 C15 C16 125.5(2) . . ? 
N3 C15 C14 110.8(2) . . ? 
C16 C15 C14 123.7(2) . . ? 
C17 C16 C15 125.8(2) . . ? 
C17 C16 C21 116.7(2) . . ? 
C15 C16 C21 117.4(2) . . ? 
N4 C17 C16 127.1(2) . . ? 
N4 C17 C18 107.3(2) . . ? 
C16 C17 C18 125.6(2) . . ? 
C19 C18 C17 107.9(2) . . ? 
C18 C19 C20 107.6(2) . . ? 
N4 C20 C1 126.0(2) . . ? 
N4 C20 C19 107.39(19) . . ? 
C1 C20 C19 126.5(2) . . ? 
C26 C21 C22 118.3(2) . . ? 
C26 C21 C16 119.3(2) . . ? 
C22 C21 C16 122.4(2) . . ? 
C23 C22 C21 120.8(2) . . ? 
C22 C23 C24 120.1(2) . . ? 
O4 C24 C25 124.0(2) . . ? 
O4 C24 C23 115.9(2) . . ? 
C25 C24 C23 120.1(2) . . ? 
C24 C25 C26 119.1(2) . . ? 
C21 C26 C25 121.5(2) . . ? 
C36 C31 C32 118.0(2) . . ? 
C36 C31 C11 119.8(2) . . ? 
C32 C31 C11 122.2(2) . . ? 
C33 C32 C31 120.5(2) . . ? 
C32 C33 C34 120.3(2) . . ? 
O5 C34 C35 123.6(2) . . ? 
O5 C34 C33 116.6(2) . . ? 
C35 C34 C33 119.8(2) . . ? 
C34 C35 C36 119.3(2) . . ? 
C35 C36 C31 122.0(2) . . ? 
C46 C41 C42 118.1(2) . . ? 
C46 C41 C6 122.4(2) . . ? 
C42 C41 C6 119.5(2) . . ? 
C43 C42 C41 121.2(2) . . ? 
C42 C43 C44 120.0(2) . . ? 
O6 C44 C45 124.9(2) . . ? 
O6 C44 C43 115.4(2) . . ? 
C45 C44 C43 119.7(2) . . ? 
C44 C45 C46 119.7(2) . . ? 
C41 C46 C45 121.4(2) . . ? 
O3 C51 C56 120.6(2) . . ? 
O3 C51 C52 117.4(2) . . ? 
C56 C51 C52 122.0(2) . . ? 
C53 C52 C51 118.1(2) . . ? 
C53 C52 C66 117.0(2) . . ? 
C51 C52 C66 124.8(2) . . ? 
C54 C53 C52 122.2(2) . . ? 
C53 C54 C55 117.2(2) . . ? 
C53 C54 C101 123.4(2) . . ? 
C55 C54 C101 119.4(2) . . ? 
C56 C55 C54 123.4(2) . . ? 
C55 C56 C51 117.0(2) . . ? 
C55 C56 C57 122.5(2) . . ? 
C51 C56 C57 120.3(2) . . ? 
C58 C57 C56 108.81(19) . . ? 
C58 C57 C64 111.5(2) . . ? 
C56 C57 C64 111.3(2) . . ? 
C58 C57 C65 108.3(2) . . ? 
C56 C57 C65 108.3(2) . . ? 
C64 C57 C65 108.6(2) . . ? 
C63 C58 C59 117.0(2) . . ? 
C63 C58 C57 120.4(2) . . ? 
C59 C58 C57 122.5(2) . . ? 
C60 C59 C58 123.1(2) . . ? 
C59 C60 C61 117.4(2) . . ? 
C59 C60 C111 121.1(2) . . ? 
C61 C60 C111 121.4(2) . . ? 
C62 C61 C60 121.9(2) . . ? 
C63 C62 C61 117.8(2) . . ? 
C63 C62 C1 121.5(2) . . ? 
C61 C62 C1 120.7(2) . . ? 
C58 C63 C62 122.8(2) . . ? 
C58 C63 O3 120.7(2) . . ? 
C62 C63 O3 116.5(2) . . ? 
O1 C66 O2 119.0(2) . . ? 
O1 C66 C52 121.7(2) . . ? 
O2 C66 C52 119.4(2) . . ? 
C102 C101 C54 109.7(2) . . ? 
C102 C101 C104 108.8(3) . . ? 
C54 C101 C104 112.0(2) . . ? 
C102 C101 C103 110.7(3) . . ? 
C54 C101 C103 107.5(2) . . ? 
C104 C101 C103 108.2(3) . . ? 
C114 C111 C113 109.4(2) . . ? 
C114 C111 C60 108.0(2) . . ? 
C113 C111 C60 111.3(2) . . ? 
C114 C111 C112 108.8(2) . . ? 
C113 C111 C112 108.2(2) . . ? 
C60 C111 C112 111.1(2) . . ? 
  
_diffrn_measured_fraction_theta_max    0.989 
_diffrn_reflns_theta_full              30.03 
_diffrn_measured_fraction_theta_full   0.989 
_refine_diff_density_max    1.101 
_refine_diff_density_min   -1.371 
_refine_diff_density_rms    0.084 
